# Supplementary material
Source: PubMed Central journal article supplement (PMC4208556)
Supplement: Supp_Fig1.pdf [file Supp_Fig1.pdf]

## Supplementary Data

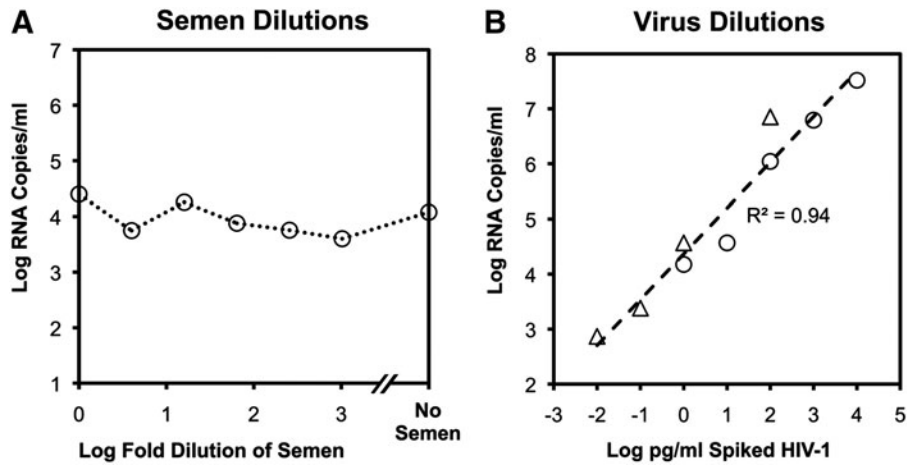

**SUPPLEMENTARY FIG. S1.** Validation of seminal plasma HIV-1 RNA measurement assay. The measurement of HIV-1 RNA in seminal plasma was validated by varying either the concentration of plasma or the concentration of HIV-1 spiked into seminal plasma from uninfected men. **(A)** A fixed amount of HIV-1 NL4-3 was spiked into seminal plasma, followed by measurement of HIV-1 RNA using the methodology described in Materials and Methods. **(B)** Varying amounts of HIV-1 NL4-3 were spiked into seminal plasma, followed by measurement of HIV-1 RNA. The *triangles* and *circles* represent two independent experiments.
